# Supplementary material for: Prevalence and Risk Factors Associated With Long-term Opioid Use After Injury Among Previously Opioid-Free Workers
Source: PubMed Central journal article supplement (PMC6647548; doi:10.1001/jamanetworkopen.2019.7222), 2019-07-17

## Supplementary Online Content

Durand Z, Nechuta S, Krishnaswami S, Hurwitz EL, McPheeters M. Prevalence and risk factors associated with long-term opioid use after injury among previously opioid-free workers. *JAMA Netw Open*. 2019;2(7):e197222.  
doi:10.1001/jamanetworkopen.2019.7222

**eTable 1.** Adjusted Odds of Long-term Opioid Use After Injury in Injured Workers Who Reported 1 Injury to Tennessee Workers' Compensation and Were Opioid Free at the Time of Injury (n = 46 399)

**eTable 2.** Adjusted Odds of Long-term Opioid Use After Injury in Injured Workers Who Reported 1 Injury to Tennessee Workers' Compensation, Were Opioid Free at the Time of Injury, and Had a Fracture (n = 4351)

**eTable 3.** Adjusted Odds of Long-term Opioid Use After Injury in Injured Workers Who Reported 1 Injury to Tennessee Workers' Compensation, Were Opioid Free at the Time of Injury, and Had a Strain, Sprain, or Tear (n = 17 833)

**eTable 4.** Adjusted Odds of Long-term Opioid Use After Injury in Injured Workers Who Reported 1 Injury to Tennessee Workers' Compensation and Were Opioid Free at the Time of Injury (n = 30 608), With Number of Prescribers and Number of Pharmacies Removed From the Model

**eTable 5.** Type of Drug Received in First Opioid Prescription After Injury, by Opioid-Free Status

**eFigure 1.** Receiver Operating Characteristic (ROC) Curves of the Multivariable Unconditional Logistic Regression Derivation Model

**eFigure 2.** Receiver Operating Characteristic (ROC) Curves of the Multivariable Unconditional Logistic Regression Validation Model

This supplementary material has been provided by the authors to give readers additional information about their work.

eTable 1. Adjusted Odds of Long-term Opioid Use After Injury in Injured Workers Who Reported 1 Injury to Tennessee Workers' Compensation and Were Opioid Free at the Time of Injury (n = 46,399)

| Characteristic                                                                   | Validation model<br>(n=15,791; c=0.91) |        |       |
|----------------------------------------------------------------------------------|----------------------------------------|--------|-------|
|                                                                                  | Adjusted OR                            | 95% CI |       |
|                                                                                  |                                        | lower  | upper |
| Part of body injured                                                             |                                        |        |       |
| Other                                                                            | ref                                    |        |       |
| Lower back                                                                       | 1.5*                                   | 1.19   | 1.98  |
| Finger(s)                                                                        | 0.5*                                   | 0.35   | 0.82  |
| Residence type                                                                   |                                        |        |       |
| Rural                                                                            | ref                                    |        |       |
| Urban                                                                            | 1.5**                                  | 1.22   | 1.82  |
| Initial days' supply                                                             |                                        |        |       |
| <5                                                                               | ref                                    |        |       |
| 5-9                                                                              | 1.7**                                  | 1.34   | 2.10  |
| 10-19                                                                            | 3.3**                                  | 2.45   | 4.47  |
| ≥20                                                                              | 24.8**                                 | 18.31  | 33.48 |
| Long-acting opioid received within 30 days of injury                             | 2.8**                                  | 1.68   | 4.62  |
| Overlapping opioid and benzodiazepine prescription days within 30 days of injury | 0.8                                    | 0.58   | 1.18  |
| Number of prescribers visited for opioids within 90 days of injury               |                                        |        |       |
| 1                                                                                | ref                                    |        |       |
| 2                                                                                | 4.8**                                  | 3.59   | 6.30  |
| ≥3                                                                               | 20.0**                                 | 14.91  | 26.94 |
| Number of pharmacies visited for opioids within 90 days of injury                |                                        |        |       |
| 1                                                                                | ref                                    |        |       |
| 2                                                                                | 1.9**                                  | 1.48   | 2.33  |
| ≥3                                                                               | 3.1**                                  | 2.27   | 4.21  |
| Maximum MME <sup>1</sup> received within 30 days of injury                       |                                        |        |       |
| <40                                                                              | ref                                    |        |       |
| 40-159                                                                           | 1.6**                                  | 1.28   | 1.92  |
| ≥160                                                                             | 3.4**                                  | 1.82   | 6.22  |
| * p<0.01                                                                         |                                        |        |       |
| ** p<0.001                                                                       |                                        |        |       |
| <sup>1</sup> MME = morphine milligram equivalents                                |                                        |        |       |

**eTable 2.** Adjusted Odds of Long-term Opioid Use After Injury in Injured Workers Who Reported 1 Injury to Tennessee Workers' Compensation, Were Opioid Free at the Time of Injury, and Had a Fracture (n = 4351)

| Characteristic                                                                                                | Derivation model<br>(n=2,755; c=0.87) |        |       | Validation model<br>(n=1,596; c=0.85) |        |       |
|---------------------------------------------------------------------------------------------------------------|---------------------------------------|--------|-------|---------------------------------------|--------|-------|
|                                                                                                               | Adjusted OR                           | 95% CI |       | Adjusted OR                           | 95% CI |       |
|                                                                                                               |                                       | lower  | upper |                                       | lower  | upper |
| Part of body injured                                                                                          |                                       |        |       |                                       |        |       |
| Other                                                                                                         | ref                                   |        |       | ref                                   |        |       |
| Lower back                                                                                                    | 2.0                                   | 0.63   | 6.23  | 4.4                                   | 0.95   | 19.91 |
| Finger(s)                                                                                                     | 0.3*                                  | 0.10   | 0.70  | 0.6                                   | 0.24   | 1.61  |
| Residence type                                                                                                |                                       |        |       |                                       |        |       |
| Rural                                                                                                         | ref                                   |        |       | ref                                   |        |       |
| Urban                                                                                                         | 1.7**                                 | 1.17   | 2.46  | 1.9*                                  | 1.14   | 3.21  |
| Initial days' supply                                                                                          |                                       |        |       |                                       |        |       |
| <5                                                                                                            | ref                                   |        |       | ref                                   |        |       |
| 5-9                                                                                                           | 1.7*                                  | 1.12   | 2.45  | 2.2*                                  | 1.29   | 3.72  |
| 10-19                                                                                                         | 6.3**                                 | 3.84   | 10.19 | 5.3**                                 | 2.70   | 10.47 |
| ≥20                                                                                                           | 11.5**                                | 5.95   | 22.42 | 7.3*                                  | 2.62   | 20.54 |
| Long-acting opioid within 30 days of injury                                                                   | 2.7**                                 | 1.38   | 5.29  | 2.5                                   | 0.98   | 6.14  |
| Overlapping opioid and benzodiazepine prescription days within 30 days of injury                              | 1.2                                   | 0.61   | 2.17  | 0.8                                   | 0.30   | 2.05  |
| Number of prescribers visited for opioids within 90 days of injury                                            |                                       |        |       |                                       |        |       |
| 1                                                                                                             | ref                                   |        |       | ref                                   |        |       |
| 2                                                                                                             | 4.2**                                 | 2.46   | 7.12  | 2.9*                                  | 1.45   | 5.90  |
| ≥3                                                                                                            | 12.0**                                | 6.76   | 21.22 | 9.3**                                 | 4.46   | 19.20 |
| Number of pharmacies visited for opioids within 90 days of injury                                             |                                       |        |       |                                       |        |       |
| 1                                                                                                             | ref                                   |        |       | ref                                   |        |       |
| 2                                                                                                             | 1.2                                   | 0.81   | 1.83  | 1.7*                                  | 1.03   | 2.91  |
| ≥3                                                                                                            | 3.5**                                 | 2.20   | 5.69  | 3.4*                                  | 1.58   | 7.29  |
| Maximum MME <sup>2</sup> received within 30 days of injury                                                    |                                       |        |       |                                       |        |       |
| <40                                                                                                           | ref                                   |        |       | ref                                   |        |       |
| 40-159                                                                                                        | 1.5*                                  | 1.003  | 2.33  | 1.6                                   | 0.93   | 2.84  |
| ≥160                                                                                                          | 4.5**                                 | 2.22   | 8.95  | 2.9                                   | 0.94   | 8.68  |
| * p<0.05                                                                                                      |                                       |        |       |                                       |        |       |
| ** p<0.001                                                                                                    |                                       |        |       |                                       |        |       |
| <sup>1</sup> Long-term opioid use was defined as receiving an opioid on most days in the 90 days after injury |                                       |        |       |                                       |        |       |
| <sup>2</sup> MME = morphine milligram equivalents                                                             |                                       |        |       |                                       |        |       |

**eTable 3. Adjusted Odds of Long-term Opioid Use After Injury in Injured Workers Who Reported 1 Injury to Tennessee Workers' Compensation, Were Opioid Free at the Time of Injury, and Had a Strain, Sprain, or Tear (n = 17 833)**

| Characteristic                                                                                                | Derivation model<br>(n=11,994; c=0.91) |        |       | Validation model<br>(n=5,839; c=0.91) |        |       |
|---------------------------------------------------------------------------------------------------------------|----------------------------------------|--------|-------|---------------------------------------|--------|-------|
|                                                                                                               | Adjusted OR                            | 95% CI |       | Adjusted OR                           | 95% CI |       |
|                                                                                                               |                                        | lower  | upper |                                       | lower  | upper |
| Part of body injured                                                                                          |                                        |        |       |                                       |        |       |
| Other                                                                                                         | ref                                    |        |       | ref                                   |        |       |
| Lower back                                                                                                    | 1.4*                                   | 1.14   | 1.71  | 1.4                                   | 1.00   | 1.84  |
| Finger(s)                                                                                                     | 0.5                                    | 0.12   | 2.37  | 1.4                                   | 0.31   | 6.02  |
| Residence type                                                                                                |                                        |        |       |                                       |        |       |
| Rural                                                                                                         | ref                                    |        |       | ref                                   |        |       |
| Urban                                                                                                         | 1.5**                                  | 1.22   | 1.83  | 1.2                                   | 0.90   | 1.63  |
| Initial days' supply                                                                                          |                                        |        |       |                                       |        |       |
| <5                                                                                                            | ref                                    |        |       | ref                                   |        |       |
| 5-9                                                                                                           | 1.4*                                   | 1.14   | 1.84  | 1.8*                                  | 1.26   | 2.53  |
| 10-19                                                                                                         | 3.8**                                  | 2.89   | 5.09  | 3.6**                                 | 2.29   | 5.70  |
| ≥20                                                                                                           | 24.8**                                 | 18.20  | 33.69 | 25.0**                                | 15.72  | 39.77 |
| Long-acting opioid within 30 days of injury                                                                   | 4.2**                                  | 2.41   | 7.27  | 4.9*                                  | 1.91   | 12.35 |
| Overlapping opioid and benzodiazepine prescription days within 30 days of injury                              | 1.5<br>(p=0.018)                       | 1.07   | 2.01  | 1.1                                   | 0.64   | 1.77  |
| Number of prescribers visited for opioids within 90 days of injury                                            |                                        |        |       |                                       |        |       |
| 1                                                                                                             | ref                                    |        |       | ref                                   |        |       |
| 2                                                                                                             | 4.4**                                  | 3.34   | 5.83  | 5.7**                                 | 3.71   | 8.62  |
| ≥3                                                                                                            | 14.9**                                 | 11.00  | 20.09 | 23.5**                                | 14.97  | 36.86 |
| Number of pharmacies visited for opioids within 90 days of injury                                             |                                        |        |       |                                       |        |       |
| 1                                                                                                             | ref                                    |        |       | ref                                   |        |       |
| 2                                                                                                             | 2.0**                                  | 1.61   | 2.57  | 1.9*                                  | 1.37   | 2.75  |
| ≥3                                                                                                            | 5.5**                                  | 4.10   | 7.47  | 2.4*                                  | 1.44   | 3.86  |
| Maximum MME <sup>2</sup> received within 30 days of injury                                                    |                                        |        |       |                                       |        |       |
| <40                                                                                                           | ref                                    |        |       | ref                                   |        |       |
| 40-159                                                                                                        | 1.7**                                  | 1.36   | 2.08  | 1.3                                   | 0.97   | 1.83  |
| ≥160                                                                                                          | 1.8                                    | 0.61   | 5.08  | 6.4*                                  | 1.61   | 25.05 |
| * p<0.01                                                                                                      |                                        |        |       |                                       |        |       |
| ** p<0.001                                                                                                    |                                        |        |       |                                       |        |       |
| <sup>1</sup> Long-term opioid use was defined as receiving an opioid on most days in the 90 days after injury |                                        |        |       |                                       |        |       |
| <sup>2</sup> MME = morphine milligram equivalents                                                             |                                        |        |       |                                       |        |       |

**eTable 4. Adjusted Odds of Long-term<sup>1</sup> Opioid Use After Injury in Injured Workers Who Reported 1 Injury to Tennessee Workers' Compensation and Were Opioid-Free at the Time of Injury (n = 30 608), With Number of Prescribers and Number of Pharmacies Removed From the Model**

| Characteristic                                                                   | Derivation model<br>(n=30,608; c=0.80) |        |       | Validation model<br>(n=15,791; c=0.78) |        |       |
|----------------------------------------------------------------------------------|----------------------------------------|--------|-------|----------------------------------------|--------|-------|
|                                                                                  | Adjusted OR                            | 95% CI |       | Adjusted OR                            | 95% CI |       |
|                                                                                  |                                        | lower  | upper |                                        | lower  | upper |
| Part of body injured                                                             |                                        |        |       |                                        |        |       |
| Other                                                                            | ref                                    |        |       | ref                                    |        |       |
| Lower back                                                                       | 1.6**                                  | 1.40   | 1.92  | 1.7**                                  | 1.32   | 2.10  |
| Finger(s)                                                                        | 0.5**                                  | 0.36   | 0.64  | 0.5*                                   | 0.36   | 0.81  |
| Residence type                                                                   |                                        |        |       |                                        |        |       |
| Rural                                                                            | ref                                    |        |       | ref                                    |        |       |
| Urban                                                                            | 1.4**                                  | 1.20   | 1.55  | 1.4*                                   | 1.13   | 1.65  |
| Initial days' supply                                                             |                                        |        |       |                                        |        |       |
| <5                                                                               | ref                                    |        |       | ref                                    |        |       |
| 5-9                                                                              | 1.8**                                  | 1.57   | 2.11  | 1.7**                                  | 1.35   | 2.07  |
| 10-19                                                                            | 3.9**                                  | 3.25   | 4.66  | 2.8**                                  | 2.15   | 3.76  |
| ≥20                                                                              | 15.6**                                 | 12.97  | 18.65 | 12.8**                                 | 9.85   | 16.63 |
| Long-acting opioid within 30 days of injury                                      | 5.2**                                  | 3.87   | 7.10  | 4.5**                                  | 2.82   | 7.22  |
| Overlapping opioid and benzodiazepine prescription days within 30 days of injury | 1.9**                                  | 1.55   | 2.33  | 1.3                                    | 0.95   | 1.82  |
| Maximum MME <sup>3</sup> received within 30 days of injury                       |                                        |        |       |                                        |        |       |
| <40                                                                              | ref                                    |        |       | ref                                    |        |       |
| 40-159                                                                           | 3.5**                                  | 3.09   | 3.99  | 3.4**                                  | 2.79   | 4.04  |
| ≥160                                                                             | 8.8**                                  | 5.92   | 13.21 | 10.2**                                 | 5.80   | 18.08 |

\* p<0.01  
\*\* p<0.001  
<sup>1</sup> Long-term opioid use was defined as receiving an opioid on most days in the 90 days after injury  
<sup>2</sup> Results from unconditional logistic regression analyses for derivation model (c=0.92)  
<sup>3</sup>MME = morphine milligram equivalents

eTable 5. Type of Drug Received in First Opioid Prescription After Injury, by Opioid-Free Status

| Drug                     | Fracture (N=4,351)   |       |             |       | Strain, sprain, or tear (N=17,833) |       |             |       |
|--------------------------|----------------------|-------|-------------|-------|------------------------------------|-------|-------------|-------|
|                          | Long-term opioid use |       |             |       | Long-term opioid use               |       |             |       |
|                          | No (n=4,057)         |       | Yes (n=294) |       | No (n=16,985)                      |       | Yes (n=848) |       |
|                          | n                    | %     | n           | %     | n                                  | %     | n           | %     |
| Hydrocodone short-acting | 2487                 | 61.30 | 127         | 43.20 | 10284                              | 60.55 | 512         | 60.38 |
| Oxycodone short-acting   | 1210                 | 29.82 | 143         | 48.64 | 2021                               | 11.90 | 117         | 13.80 |
| Tramadol short-acting    | 314                  | 7.74  | 17          | 5.78  | 4123                               | 24.27 | 212         | 25.00 |
| Codeine                  | 54                   | 1.33  | 1           | 0.34  | 544                                | 3.20  | 11          | 1.30  |
| Morphine long-acting     | 13                   | 0.32  | 8           | 2.72  | 7                                  | 0.04  | 2           | 0.24  |

Note: Drug categories are nonexclusive

**eFigure 1.** Receiver Operating Characteristic (ROC) Curves of the Multivariable Unconditional Logistic Regression Derivation Model

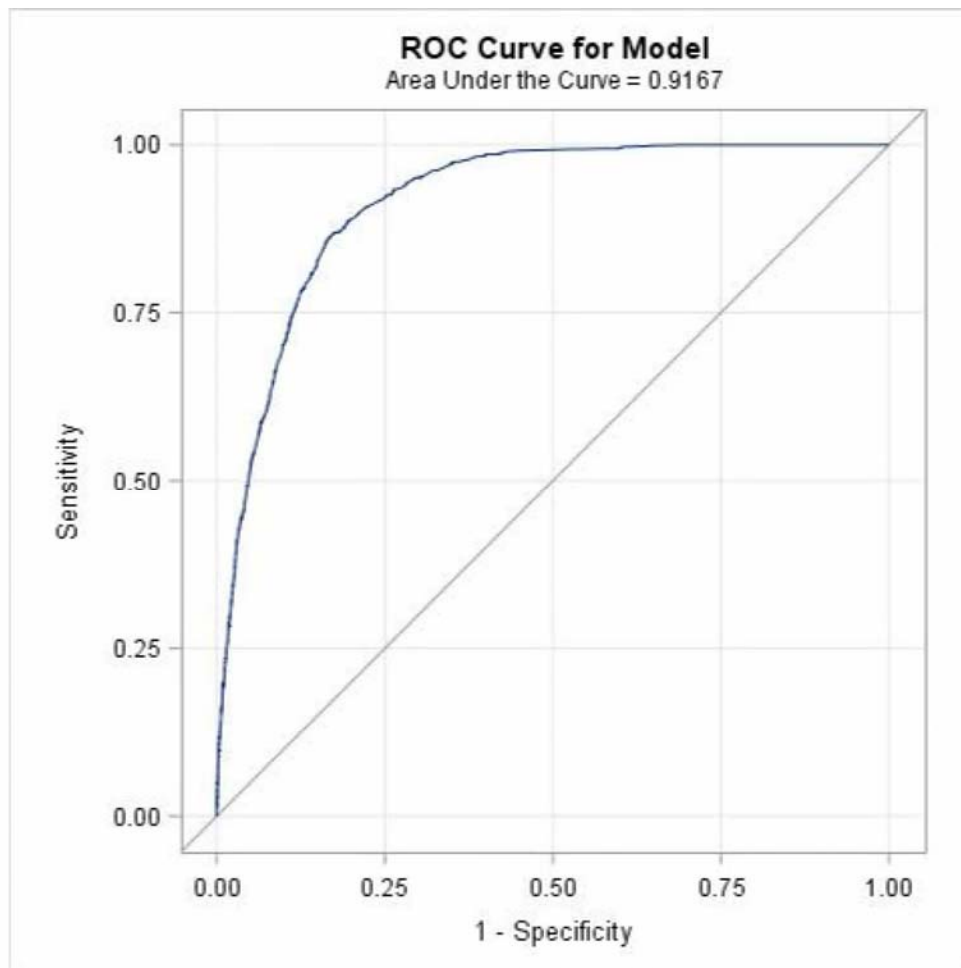

**eFigure 2.** Receiver Operating Characteristic (ROC) Curves of the Multivariable Unconditional Logistic Regression Validation Model

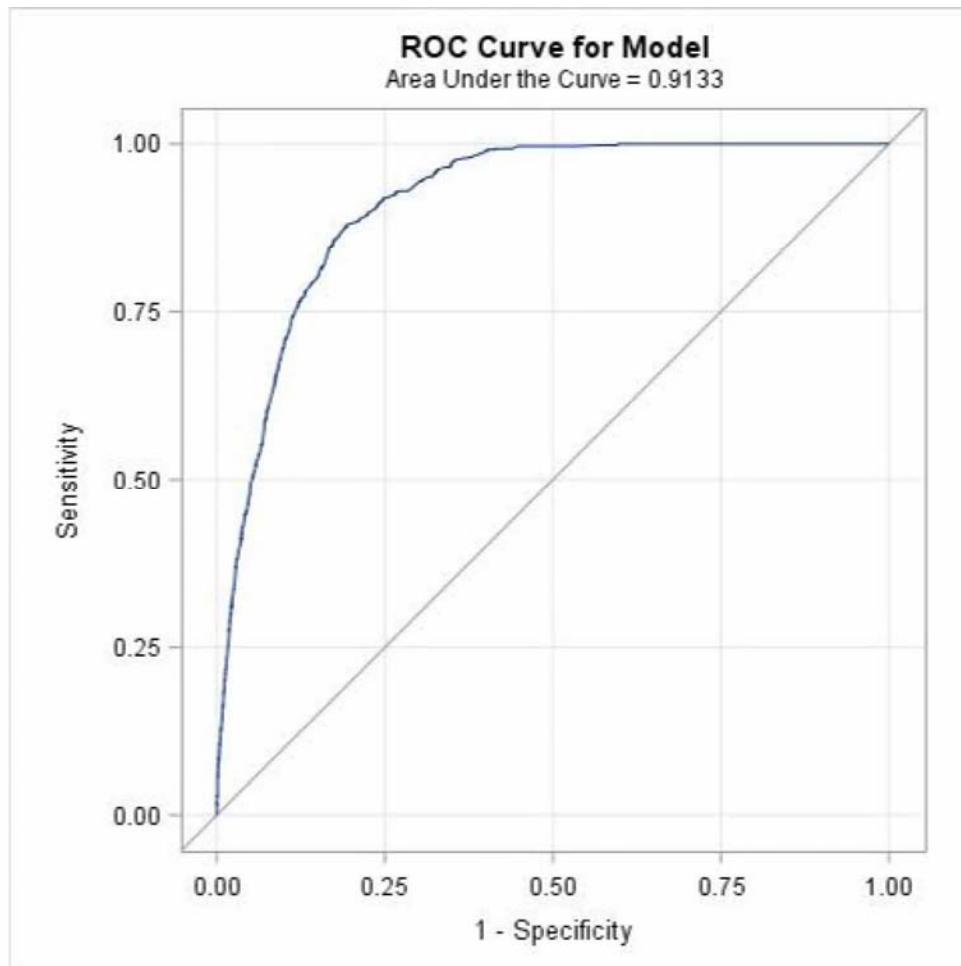

Supplement: jamanetwopen-2-e197222-s001.pdf [file jamanetwopen-2-e197222-s001.pdf]
